# Supplementary material for: Discordant nature of Cd in GeTe enhances phonon scattering and improves band convergence for high thermoelectric performance
Source: Royal Society of Chemistry journal article supplement (doi:10.1039/c9ta10436d), 2019-12-09
Supplement: c9ta10436d1.pdf [file c9ta10436d1.pdf]

**Supporting Information**

**Discordant Nature of Cd in GeTe Enhances Phonon  
Scattering and Improves Band Convergence for High  
Thermoelectric Performance**

Evariste Nshimiyimana,<sup>a</sup> Shiqiang Hao,<sup>b</sup> Xianli Su,<sup>a\*</sup> Cheng Zhang,<sup>a</sup> Wei Liu,<sup>a</sup> Yonggao Yan,<sup>a</sup>

Ctirad Uher,<sup>d</sup> Chris Wolverton,<sup>b</sup> Mercuri G. Kanatzidis,<sup>b,c</sup> and Xinfeng Tang<sup>a\*</sup>

<sup>a</sup> *State Key Laboratory of Advanced Technology for Materials Synthesis and Processing*

*Wuhan University of Technology, Wuhan 430070, China*

<sup>b</sup> *Department of Materials Science and Engineering, Northwestern University, Evanston, Illinois*

*60208, USA*

<sup>c</sup> *Department of Chemistry, Northwestern University, Evanston, Illinois 60208, USA*

<sup>d</sup> *Department of Physics, University of Michigan, Ann Arbor, MI 48109, USA*

*Corresponding authors: Xianli Su (suxianli@whut.edu.cn), Xinfeng Tang (tangxf@whut.edu.cn).*

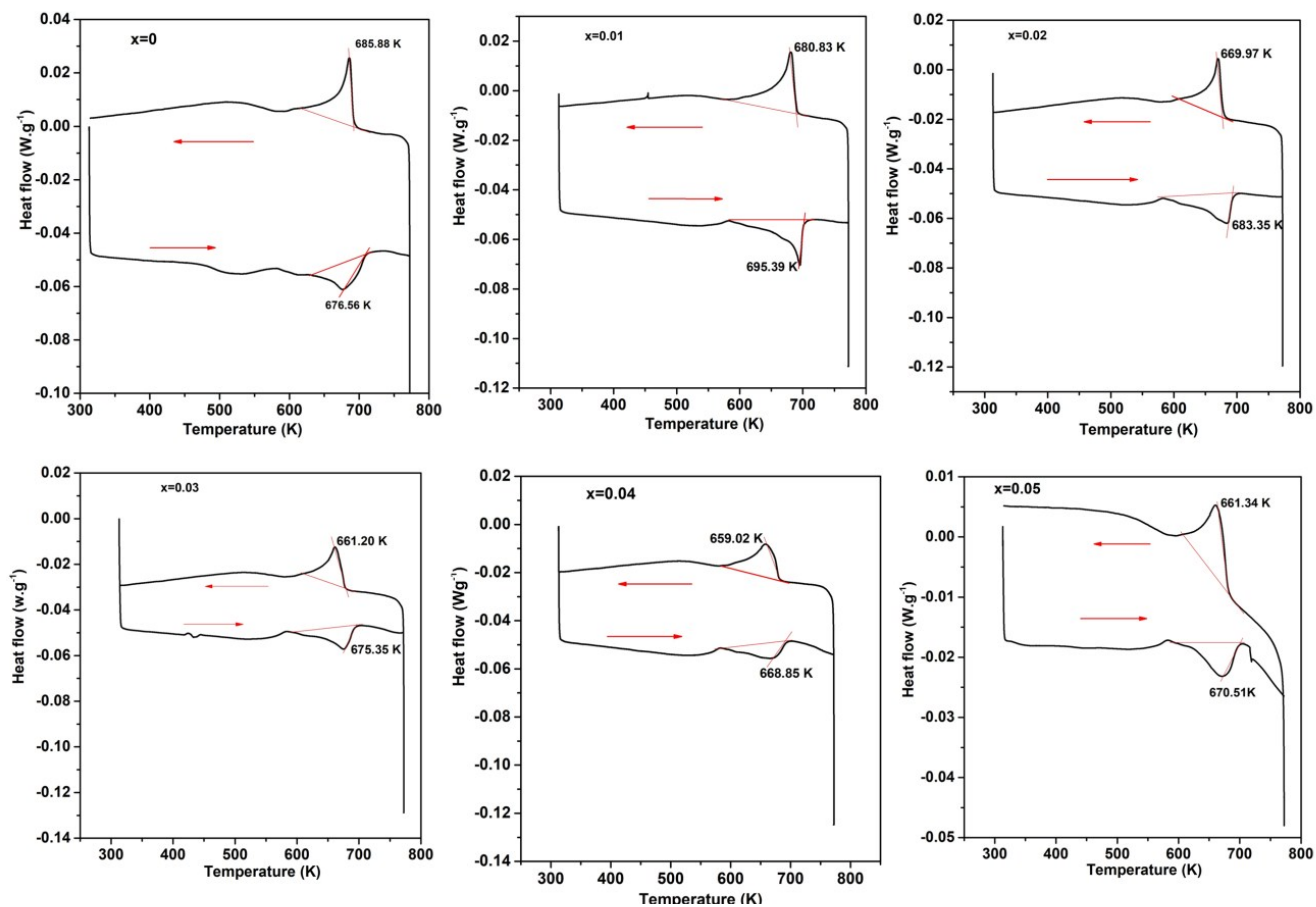

**Figure S1.** Heat flow from DSC measurements showing the phase transition temperature of  $\text{Ge}_{1-x}\text{Cd}_x\text{Te}$  ( $x = 0-0.05$ ).

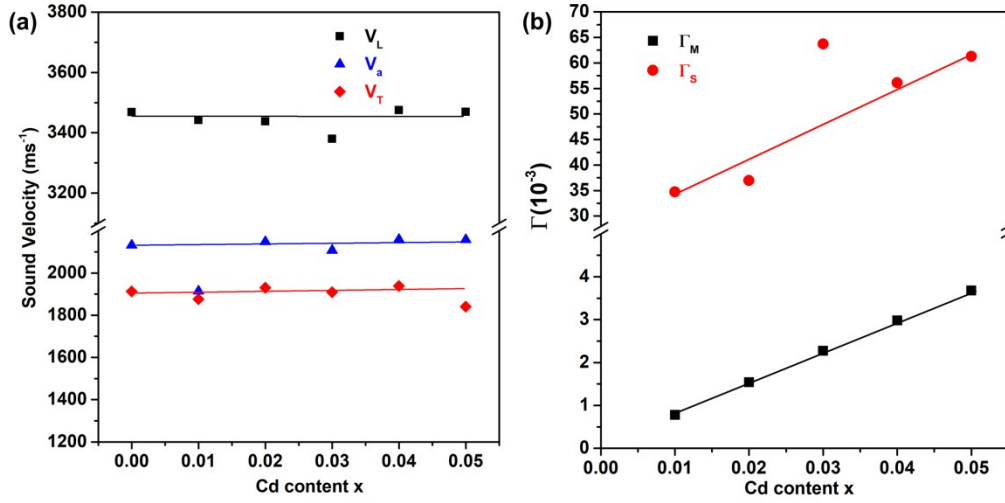

**Figure S2.** (a) Room temperature sound velocity and (b) mass fluctuation scattering parameter ( $\Gamma_M$ ), and strain fluctuation scattering parameter ( $\Gamma_S$ ) of  $\text{Ge}_{1-x}\text{Cd}_x\text{Te}$  ( $x = 0-0.05$ ).

**Scattering parameter calculations:** Callaway suggests that the impurity scattering parameter ( $\Gamma$ ) can be calculated by fitting the lattice thermal conductivity of a disordered compound ( $\kappa_L$ ) and the lattice thermal conductivity of an ordered pure GeTe ( $\kappa_L^P$ ) compound through Eq. 1:

$$\frac{\kappa_L}{\kappa_L^P} = \frac{\tan^{-1} u}{u}, \quad u^2 = \frac{\pi^2 \Theta_D \Omega}{v^2} \kappa_L^P \Gamma$$

(1)

where  $u$  is the disorder scaling parameter,  $\Theta_D$  is the Debye temperature (244 K for pure GeTe),  $\Omega$  is the average atomic volume,  $h$  is the Planck's constant, and  $v$  is the average sound velocity (2452 m/s for pure GeTe). In the model of Slack<sup>1</sup> and Abeles<sup>2</sup>, considering the disorder scattering parameter as a combined value of disorder from both mass and strain field fluctuations allows to express  $\Gamma$  as:  $\Gamma = \Gamma_M + \Gamma_S$ , where  $\Gamma_M$  and  $\Gamma_S$  are the mass and strain fluctuation parameters, respectively, given by

$$\Gamma_M = \frac{\sum_{i=1}^n ci \left(\frac{\bar{M}_i}{\bar{M}}\right)^2 f_i^1 f_i^2 \left(\frac{M_i^1 - M_i^2}{\bar{M}_i}\right)^2}{\sum_{i=1}^n ci}$$

(2)

$$\Gamma_S = \frac{\sum_{i=1}^n ci \left(\frac{\bar{M}_i}{\bar{M}}\right)^2 f_i^1 f_i^2 \varepsilon_1 \left(\frac{r_i^1 - r_i^2}{\bar{r}_i}\right)^2}{\sum_{i=1}^n ci}$$

(3)

Here  $n$  is the number of different atoms in the lattice ( $n = 2$  in GeTe) and  $ci$  is the degeneracy of the atomic occupancy ( $c_1 = c_2 = 1$ ),  $\bar{M}_i$  and  $\bar{r}_i$  are the average atomic mass and radius on the  $i^{\text{th}}$  sublattice, respectively,  $\bar{M}$  is the average relative atomic mass of the compound,  $f_i^k$  is the fractional occupation of the  $k^{\text{th}}$  atoms on the  $i^{\text{th}}$  sublattice,  $\varepsilon_1$  is the phenomenological adjustable parameter,  $M_i^k$  and  $r_i^k$  are the atomic mass and radius, respectively, expressed as:

$$M_i^k = \sum_k f_i^k M_i^k \tag{4}$$

$$r_i^k = \sum_k f_i^k r_i^k \tag{5}$$

$$\bar{M} = \frac{\sum_{i=1}^n C_i \bar{M}_i}{\sum_{i=1}^n C_i}$$

(6)

Following the above expressions, a simplified expression for the impurity scattering parameter

$\Gamma$  is derived and can be written as:

$$\Gamma = \frac{1}{4} \left( \frac{\bar{M}_1}{\bar{M}} \right)^2 x(1-x) \left[ \left( \frac{M_1^1 - M_1^2}{\bar{M}_1} \right)^2 + \varepsilon_1 \left( \frac{r_1^1 - r_2^1}{\bar{r}_1} \right)^2 \right]$$

(7)

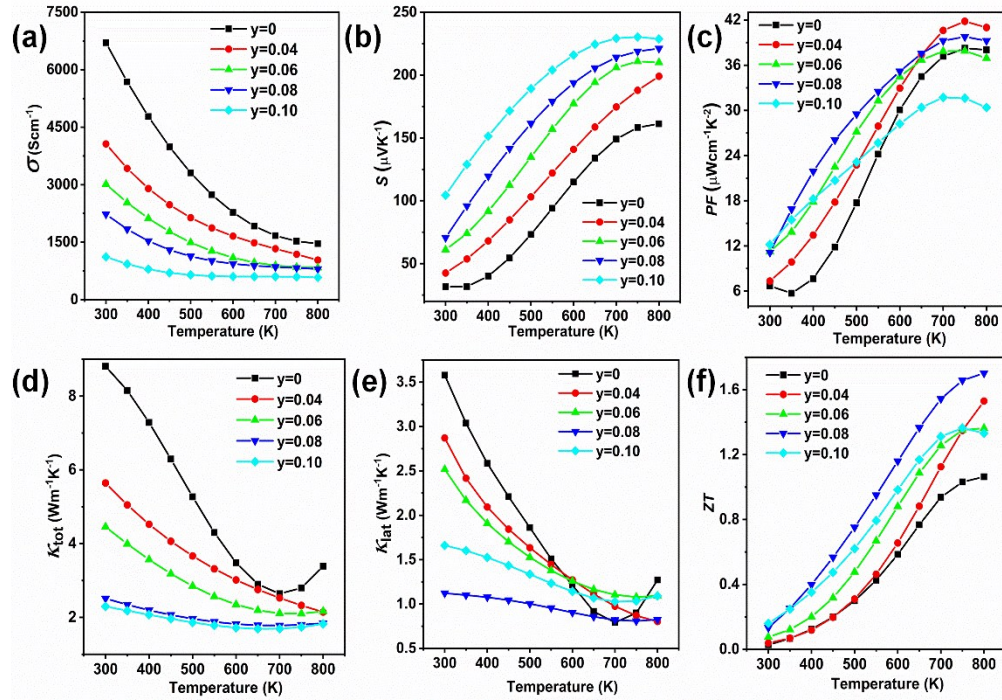

**Figure S3.** Temperature dependent thermoelectric transport properties for  $\text{Ge}_{1-y}\text{Sb}_y\text{Te}$  ( $y = 0-0.10$ ): (a) electrical conductivity, (b) Seebeck coefficient, (c) power factor, (d) total thermal conductivity, (e) lattice thermal conductivity and (f) figure of merit,  $ZT$ .

**Electronic thermal conductivity and Lorenz number of  $\text{Ge}_{0.97-y}\text{Cd}_{0.03}\text{Sb}_y\text{Te}$ :** The electronic thermal conductivity is calculated from the Wiedemann-Franz law,  $\kappa_e = L\sigma T$ , where  $L$  is the Lorenz number.  $L$  was calculated using the chemical potential, estimated by fitting the

experimental Seebeck coefficient.  $\sigma$  is the measured electrical conductivity and  $T$  is the absolute temperature.

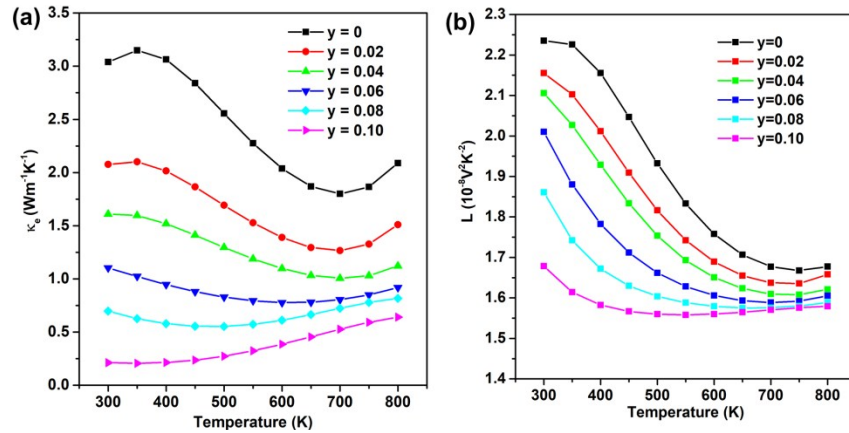

**Figure S4.** (a) Temperature-dependent electronic thermal conductivity of the Ge<sub>0.97-y</sub>Cd<sub>0.03</sub>Sb<sub>y</sub>Te ( $y = 0-0.10$ ) sample and (b) Lorenz number as a function of temperature of Ge<sub>0.97-y</sub>Cd<sub>0.03</sub>Sb<sub>y</sub>Te ( $y = 0-0.10$ ).

## References

- (1) Slack, G. A. Effect of isotopes on low-temperature thermal conductivity. *Physical Review* **1957**, *105* (3), 829.
- (2) Abeles, B. Lattice thermal conductivity of disordered semiconductor alloys at high temperatures. *Physical Review* **1963**, *131* (5), 1906.
